# Supplementary material for: Static embedding with pair coupled cluster doubles based methods
Source: Royal Society of Chemistry journal article supplement (doi:10.1039/d3cp02502k), 2023-01-01
Supplement: d3cp02502k1.pdf [file d3cp02502k1.pdf]

---

# Static Embedding with Pair Coupled Cluster Doubles Based Methods

Rahul Chakraborty, Katharina Boguslawski, and Paweł Tecmer

*Institute of Physics, Faculty of Physics, Astronomy and Informatics,  
Nicolaus Copernicus University in Torun,  
Grudziadzka 5, 87-100 Torun, Poland*

**Supplementary Information**

## S1 XYZ Coordinates of H<sub>2</sub>O ··· NH<sub>3</sub> Complex

Table S1: XYZ Coordinates of the optimized H<sub>2</sub>O ··· NH<sub>3</sub> structure in Å.

|   |            |            |            |
|---|------------|------------|------------|
| N | -0.3247549 | -1.0163481 | 0.2284577  |
| H | 0.3853716  | -1.6985302 | 0.3923495  |
| H | -0.9158405 | -0.9874769 | 1.0326156  |
| H | -0.8749286 | -1.3247542 | -0.5458969 |
| O | 0.3171256  | 1.9052994  | -0.5156991 |
| H | 1.2106186  | 2.1227180  | -0.3263054 |
| H | 0.2024080  | 0.9990920  | -0.2655214 |

## S2 EOM-CCSD vertical excitation energies of the H-bonded structures

Table S2: Vertical excitation energies (in eV) of H<sub>2</sub>O ··· NH<sub>3</sub> calculated with EOM-CCSD and aug-cc-pVDZ basis set. For each particular excitation, we show the VEE of the isolated source of excitation at the unrelaxed geometry of the complex.

|                  | Fragment        | supramolecule |
|------------------|-----------------|---------------|
| H <sub>2</sub> O | NH <sub>3</sub> |               |
|                  | 6.42            | 6.86          |
| 7.55             |                 | 7.47          |
|                  | 7.96            | 8.43          |
|                  | 7.96            | 8.48          |

Table S3: The environmental shifts ( $\Delta E_{\text{env}}$ ) in vertical excitation energies (in eV) for the H<sub>2</sub>O ··· NH<sub>3</sub> complex calculated with EOM-pCCD-LCCSD and compared with EOM-CCSD values.  $\Delta E_{\text{env}}$  is calculated as  $(VEE_{\text{supra}} - VEE_{\text{frag}})$ , where  $VEE_{\text{supra}}$  is the VEE of the supramolecule and  $VEE_{\text{frag}}$  is the same for the bare source of excitation at the unrelaxed geometry of the complex.

| Source of excitation | EOM-pCCD-LCCSD | EOM-CCSD |
|----------------------|----------------|----------|
| NH <sub>3</sub>      | +0.43          | +0.44    |
| H <sub>2</sub> O     | -0.10          | -0.08    |
| NH <sub>3</sub>      | +0.46          | +0.47    |
| NH <sub>3</sub>      | +0.51          | +0.52    |

Table S4: Vertical excitation energies (in eV) of thymine in microsolvation calculated with EOM-CCSD and aug-cc-pVDZ basis set.  $\Delta E_{\text{env}}$  is calculated as  $(VEE_{\text{supra}} - VEE_{\text{frag}})$ , where  $VEE_{\text{supra}}$  is the VEE of the supramolecule and  $VEE_{\text{frag}}$  is the same for the bare thymine at the unrelaxed geometry of the complex.

| Thymine | Thymine in microsolvation | $\Delta E_{\text{env}}$ |
|---------|---------------------------|-------------------------|
| 5.34    | 5.86                      | +0.52                   |
| 5.87    | 6.30                      | +0.43                   |
| 6.77    | 7.15                      | +0.38                   |

### S3 Spin-Orbit Coupling

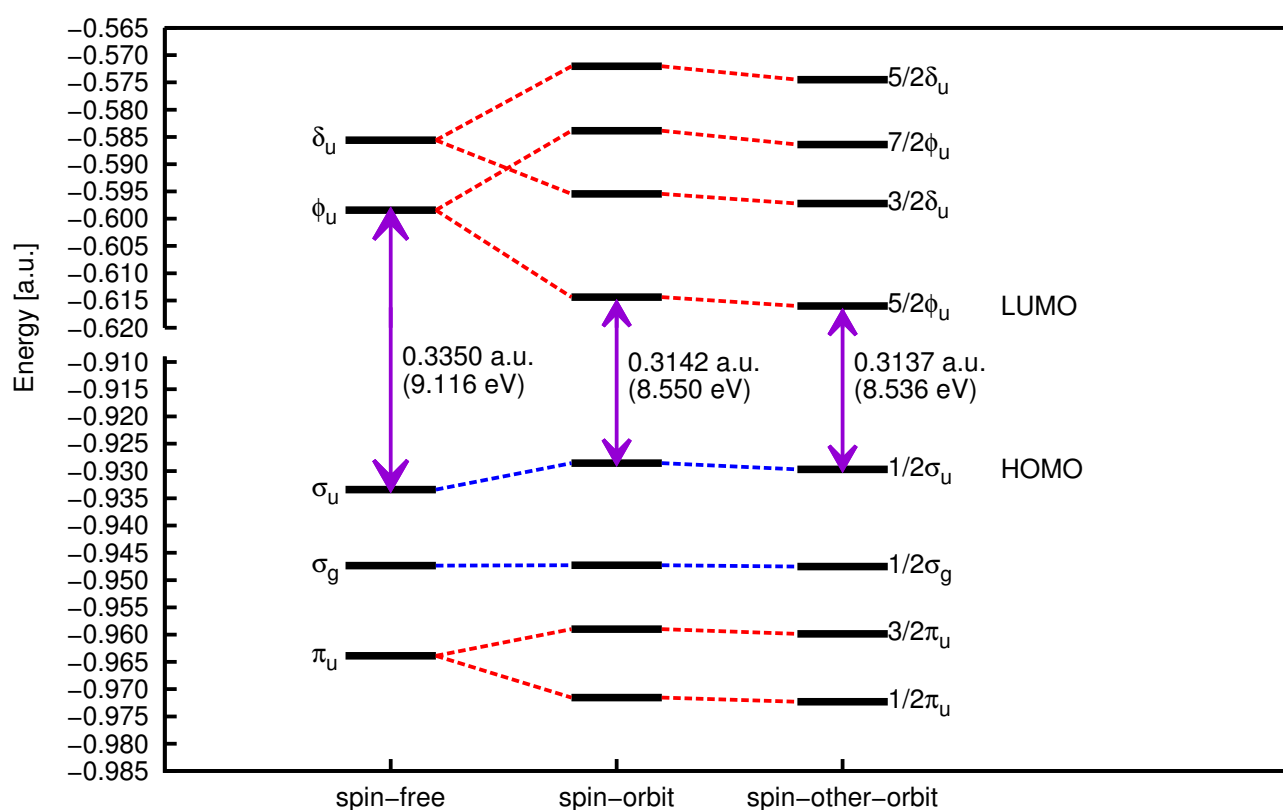

Figure S1: Comparison of Dirac-Hartree-Fock orbital energies of uranyl computed with different Hamiltonians: Dyall spin-free, (spin-orbit) Dirac-Coulomb, and Dirac-Coulomb-Breit (spin-other-orbit). The computations were performed with the Dirac2012 software package, aug-cc-pVTZ (O), and dyall.v3z (U) basis sets for U-O bond length of 1.708 Å.

## S4 EOM-CCSD vertical excitation energies of uranyl tetrahalides

Table S5 shows the vertical excitation energies of the uranyl tetrahalides and the corresponding bare uranyl moieties. For the bare uranyl moieties, it is to be noted that the two  $\delta_u$  orbitals are degenerate. We label them as  $\delta_u$  and  $\delta'_u$  to keep parity with the tetrahalides. We observe two transitions with both  $\pi_u \rightarrow \delta_u$  and  $\pi_u \rightarrow \delta'_u$  characters, in case of bare uranyls. For  $\text{UO}_2\text{Br}_4^{2-}$ , the  $\pi_u \rightarrow \delta'_u$  transition is not observed with the 15 roots targeted in our EOM-CCSD calculation.

Table S5: EOM-CCSD/ANO-RCC-VDZP vertical excitation energies (in eV) of uranyl and its tetrahalides. The transitions are labelled according to their transition characters and not in the order of energies. The bare  $\text{UO}_2^{2+}$  calculations are done at each uranyl tetrahalide geometry, removing the halide atoms. The values in boldface in the 3rd column are the corresponding EOM-pCCD-LCCSD excitation energies of the bare uranyl, given here for comparison. Environmental shifts in EOM-CCSD excitation energies of uranyl due to the tetrahalide environment are given in the parenthesis in the 4th column.

| System                        | Character (Term)                                    | $\text{UO}_2^{2+}$   | $\text{UO}_2\text{X}_4^{2-}$ |
|-------------------------------|-----------------------------------------------------|----------------------|------------------------------|
| $\text{UO}_2\text{F}_4^{2-}$  | $\sigma_u \rightarrow \phi_u$ ( ${}^1\Phi_g$ )      | 3.02 ( <b>3.50</b> ) | 4.22 (1.20)                  |
|                               | $\sigma_u \rightarrow \delta_u$ ( ${}^1\Delta_g$ )  | 3.39 ( <b>3.89</b> ) | 3.89 (0.50)                  |
|                               | $\sigma_u \rightarrow \delta'_u$ ( ${}^1\Delta_g$ ) | 3.39 ( <b>3.89</b> ) | 4.14 (0.75)                  |
|                               | $\pi_u \rightarrow \delta_u$ ( ${}^1\Gamma_g$ )     | 3.83 ( <b>4.82</b> ) | 4.91 (1.08)                  |
|                               | $\pi_u \rightarrow \delta'_u$ ( ${}^1\Pi_g$ )       | 3.92 ( <b>4.94</b> ) | 5.24 (1.32)                  |
| $\text{UO}_2\text{Cl}_4^{2-}$ | $\sigma_u \rightarrow \phi_u$ ( ${}^1\Phi_g$ )      | 3.26 ( <b>3.68</b> ) | 4.04 (0.78)                  |
|                               | $\sigma_u \rightarrow \delta_u$ ( ${}^1\Delta_g$ )  | 3.62 ( <b>4.05</b> ) | 3.98 (0.36)                  |
|                               | $\sigma_u \rightarrow \delta'_u$ ( ${}^1\Delta_g$ ) | 3.62 ( <b>4.05</b> ) | 4.08 (0.46)                  |
|                               | $\pi_u \rightarrow \delta_u$ ( ${}^1\Gamma_g$ )     | 4.16 ( <b>5.02</b> ) | 5.01 (0.85)                  |
|                               | $\pi_u \rightarrow \delta'_u$ ( ${}^1\Pi_g$ )       | 4.25 ( <b>5.13</b> ) | 5.08 (0.83)                  |
| $\text{UO}_2\text{Br}_4^{2-}$ | $\sigma_u \rightarrow \phi_u$ ( ${}^1\Phi_g$ )      | 3.29 ( <b>3.69</b> ) | 3.83 (0.54)                  |
|                               | $\sigma_u \rightarrow \delta_u$ ( ${}^1\Delta_g$ )  | 3.66 ( <b>4.07</b> ) | 3.79 (0.13)                  |
|                               | $\sigma_u \rightarrow \delta'_u$ ( ${}^1\Delta_g$ ) | 3.66 ( <b>4.07</b> ) | 3.87 (0.21)                  |
|                               | $\pi_u \rightarrow \delta_u$ ( ${}^1\Gamma_g$ )     | 4.21 ( <b>5.05</b> ) | 4.44 (0.23)                  |
|                               | $\pi_u \rightarrow \delta'_u$ ( ${}^1\Pi_g$ )       | 4.30 ( <b>5.16</b> ) | –                            |

## S5 Orbital entropies and mutual information of uranyl tetrahalides

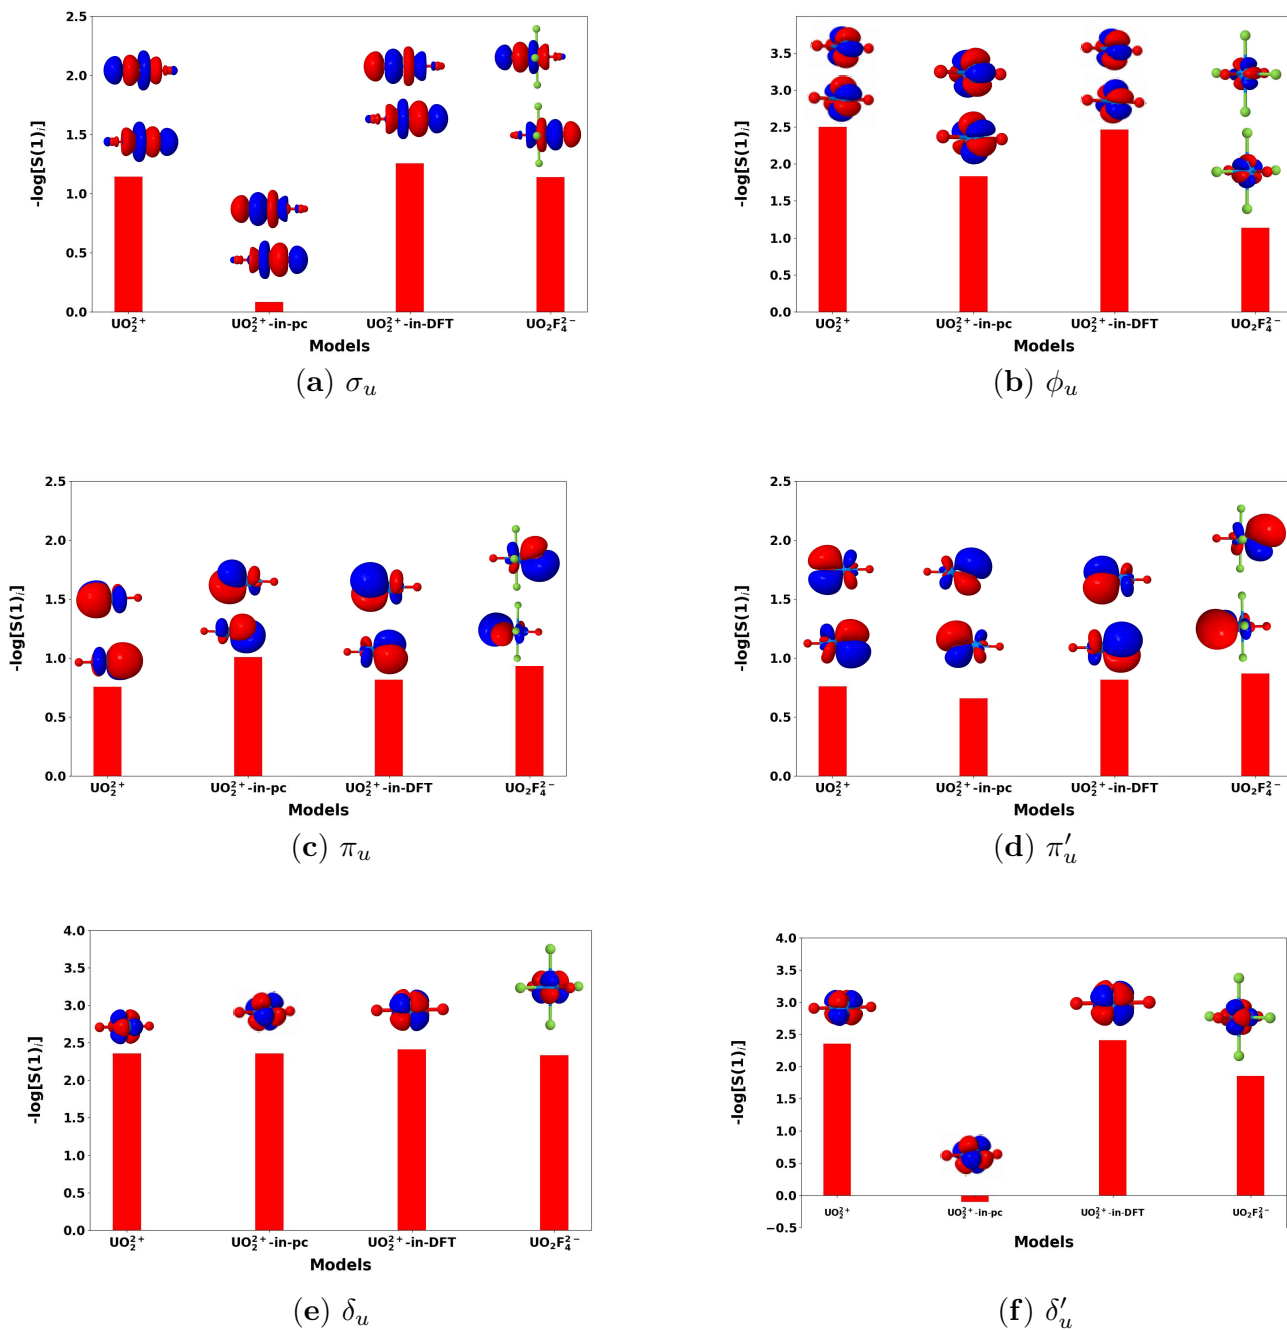

Figure S2: Single-orbital entropies of  $\text{UO}_2\text{F}_4^{2-}$  and related models.

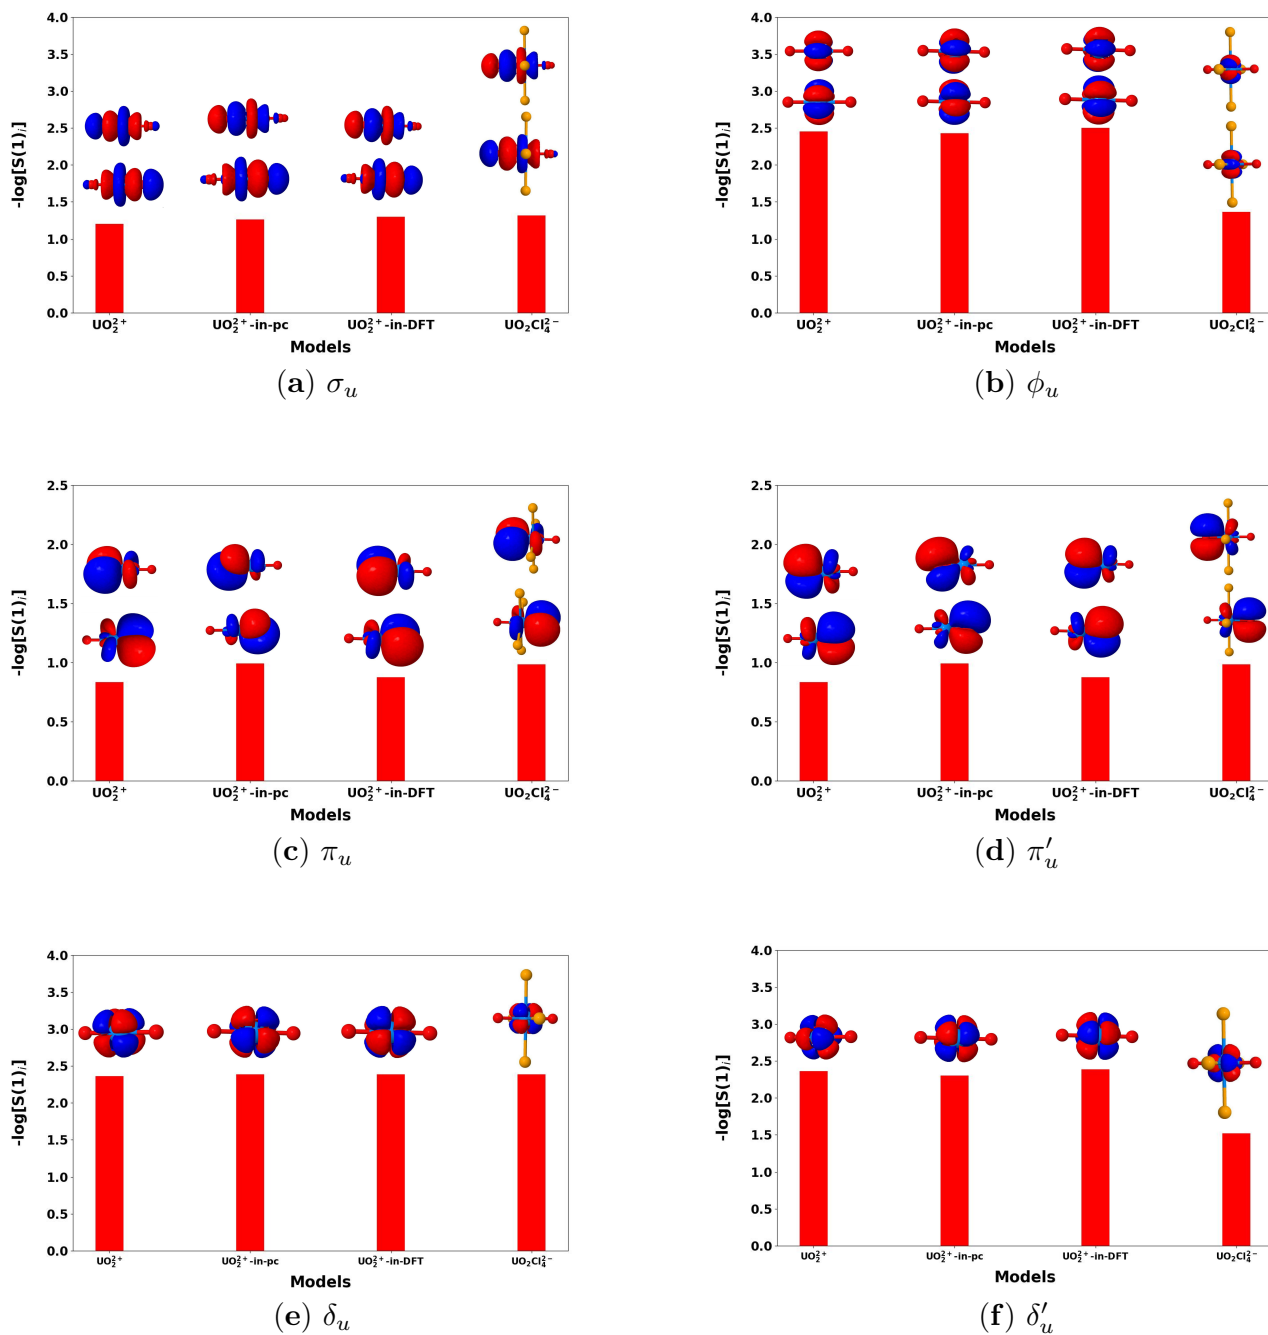

Figure S3: Single-orbital entropies of  $\text{UO}_2\text{Cl}_4^{2-}$  and related models.

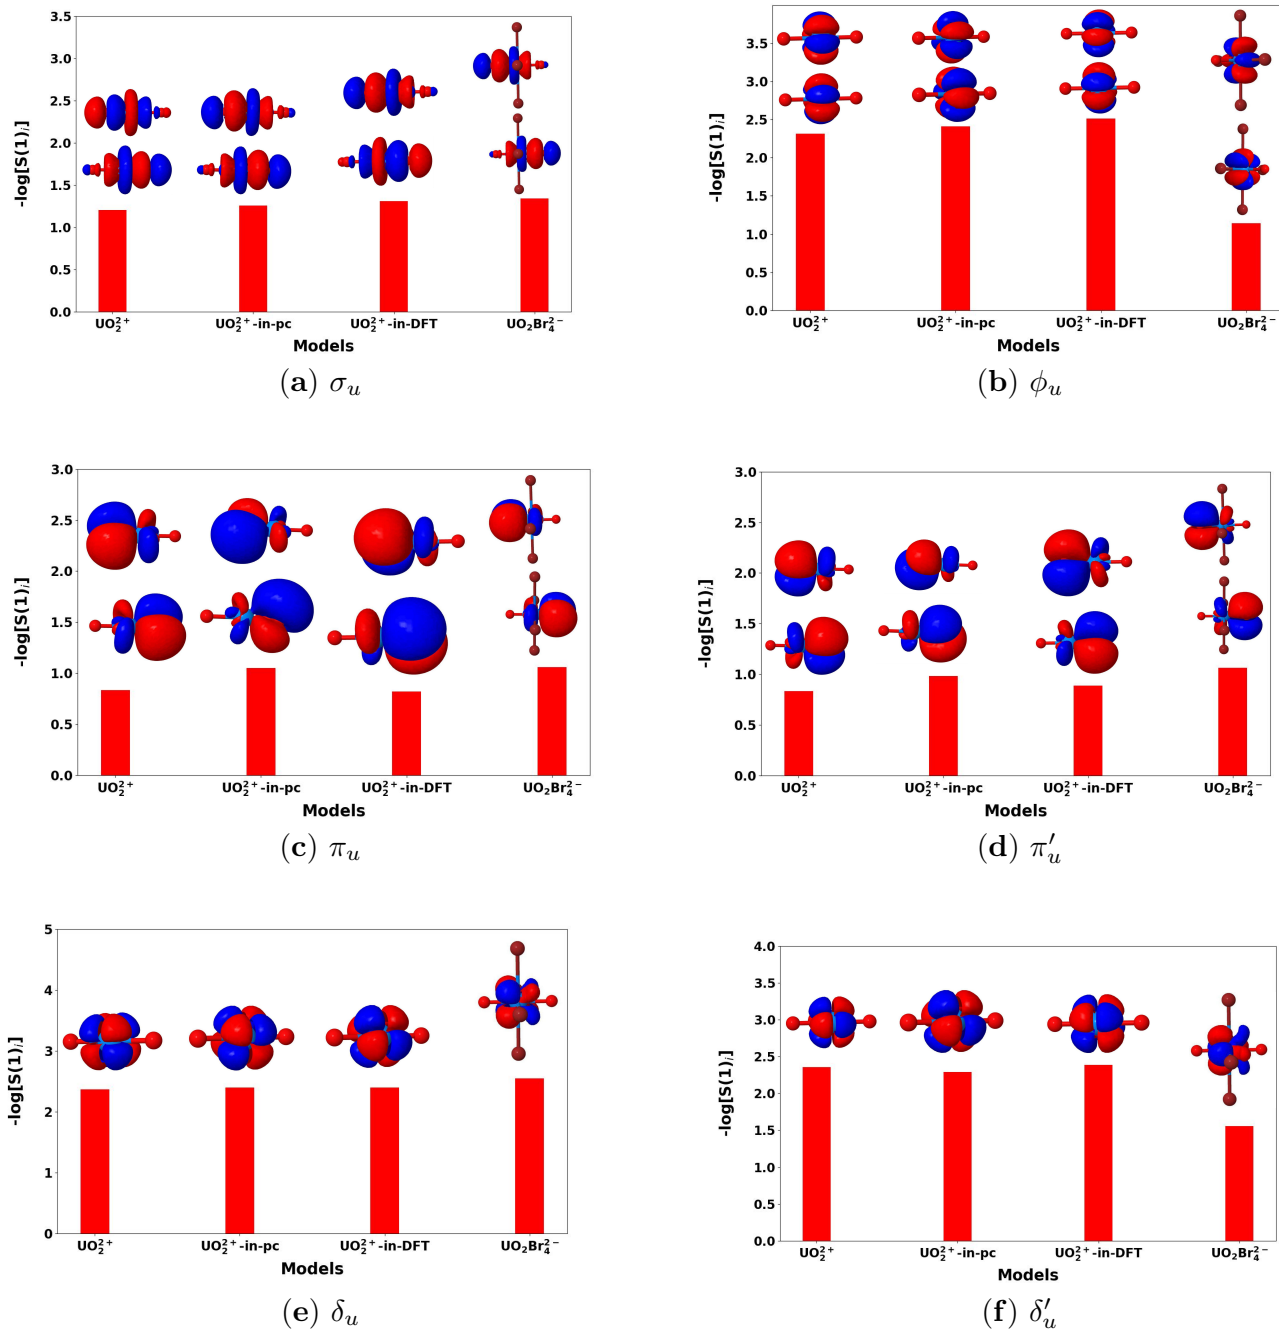

Figure S4: Single-orbital entropies of  $\text{UO}_2\text{Br}_4^{2-}$  and related models.

Table S6: Single-orbital entropies ( $s(1)_i$ ) of the uranyl orbitals involved in the electronic spectra of the different moieties. The  $s(1)_i$  values are calculated with the pCCD-LCCSD method.

| System                                        | Orbital    | UO <sub>2</sub> <sup>2+</sup> | WFT-in-pc | WFT-in-DFT | Supramolecule |
|-----------------------------------------------|------------|-------------------------------|-----------|------------|---------------|
| UO <sub>2</sub> F <sub>4</sub> <sup>2-</sup>  | $\sigma_u$ | 0.319                         | 0.920     | 0.279      | 0.323         |
|                                               |            | 0.319                         | 0.921     | 0.292      | 0.324         |
|                                               | $\pi_u$    | 0.470                         | 0.373     | 0.443      | 0.371         |
|                                               |            | 0.470                         | 0.359     | 0.443      | 0.402         |
|                                               |            | 0.469                         | 0.512     | 0.442      | 0.420         |
|                                               |            | 0.469                         | 0.526     | 0.442      | 0.421         |
|                                               | $\phi_u$   | 0.082                         | 0.087     | 0.085      | 0.209         |
|                                               |            | 0.082                         | 0.233     | 0.085      | 0.232         |
|                                               | $\delta_u$ | 0.095                         | 0.095     | 0.090      | 0.097         |
|                                               |            | $\delta'_u$                   | 0.095     | 1.11       | 0.090         |
| UO <sub>2</sub> Cl <sub>4</sub> <sup>2-</sup> | $\sigma_u$ | 0.292                         | 0.281     | 0.273      | 0.266         |
|                                               |            | 0.309                         | 0.284     | 0.273      | 0.269         |
|                                               | $\pi_u$    | 0.434                         | 0.362     | 0.417      | 0.373         |
|                                               |            | 0.434                         | 0.366     | 0.417      | 0.373         |
|                                               |            | 0.434                         | 0.370     | 0.417      | 0.373         |
|                                               |            | 0.434                         | 0.371     | 0.417      | 0.373         |
|                                               | $\phi_u$   | 0.086                         | 0.084     | 0.082      | 0.255         |
|                                               |            | 0.086                         | 0.092     | 0.082      | 0.255         |
|                                               | $\delta_u$ | 0.094                         | 0.092     | 0.092      | 0.092         |
|                                               |            | $\delta'_u$                   | 0.094     | 0.100      | 0.092         |
| UO <sub>2</sub> Br <sub>4</sub> <sup>2-</sup> | $\sigma_u$ | 0.300                         | 0.279     | 0.269      | 0.260         |
|                                               |            | 0.300                         | 0.290     | 0.270      | 0.264         |
|                                               | $\pi_u$    | 0.435                         | 0.344     | 0.411      | 0.346         |
|                                               |            | 0.435                         | 0.354     | 0.411      | 0.346         |
|                                               |            | 0.435                         | 0.372     | 0.411      | 0.345         |
|                                               |            | 0.435                         | 0.375     | 0.411      | 0.345         |
|                                               | $\phi_u$   | 0.099                         | 0.090     | 0.081      | 0.319         |
|                                               |            | 0.099                         | 0.090     | 0.081      | 0.320         |
|                                               | $\delta_u$ | 0.094                         | 0.091     | 0.091      | 0.078         |
|                                               |            | $\delta'_u$                   | 0.095     | 0.101      | 0.092         |



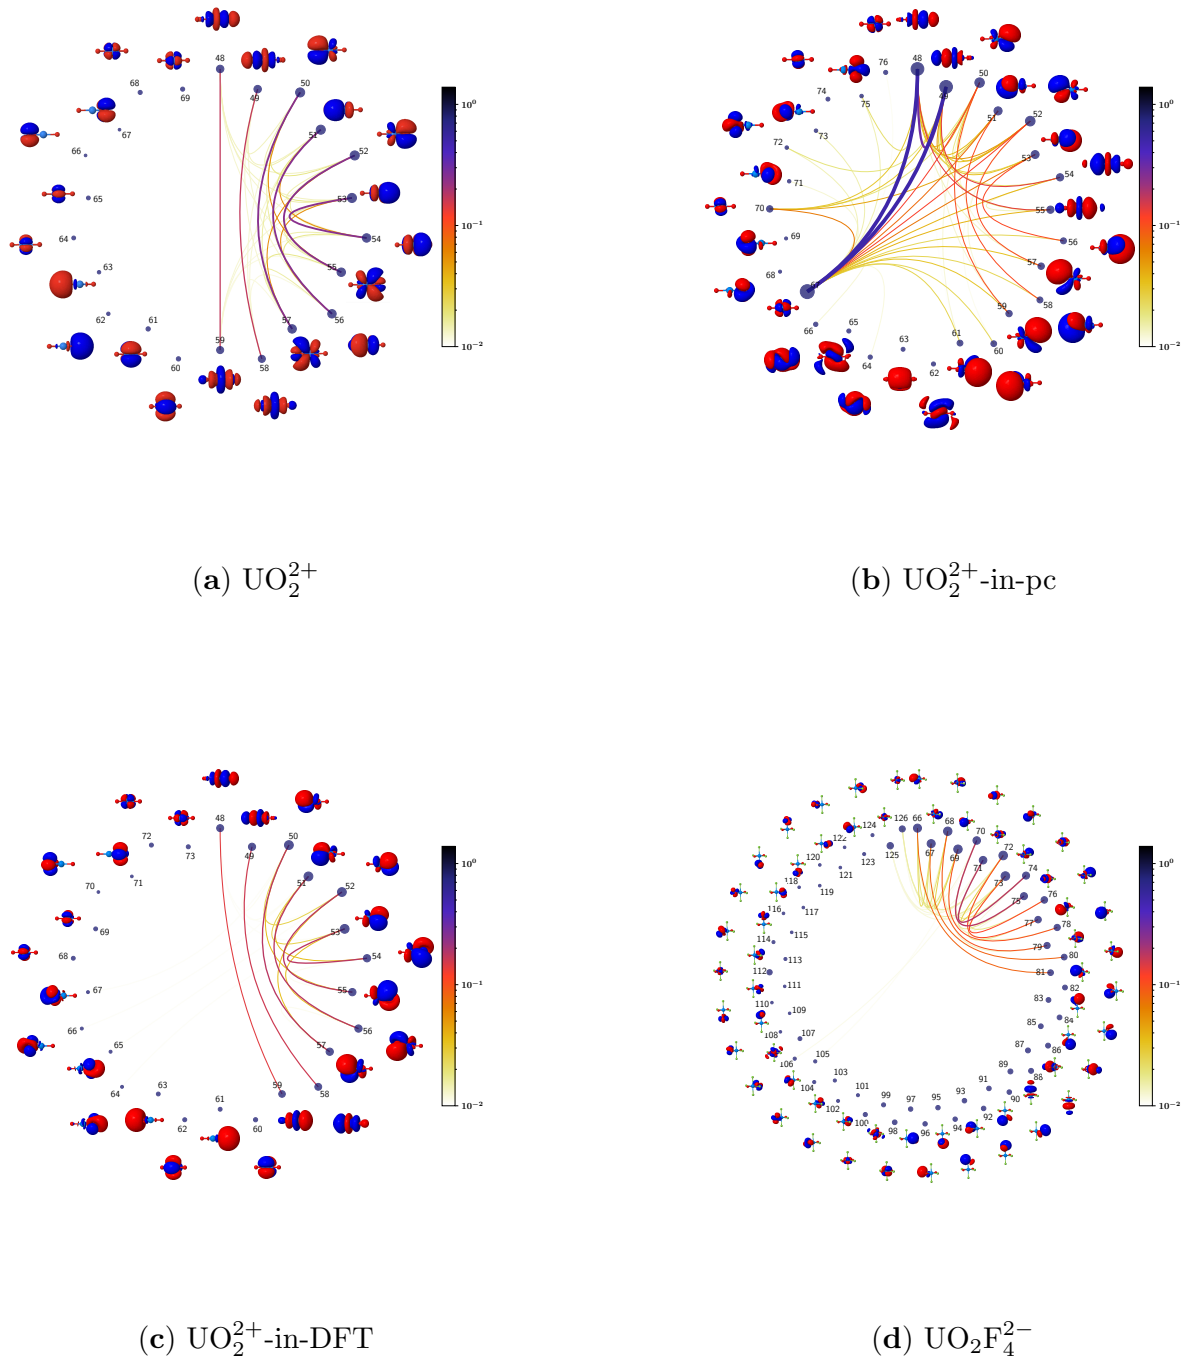

Figure S5: Mutual information ( $I_{ij}$ ) of  $\text{UO}_2\text{F}_4^{2-}$  and related models studied in this work. The orbitals are numbered as obtained after pCCD optimization. The  $I_{ij}$  values are calculated based on single-orbital entropies calculated with the pCCD-LCCSD method.

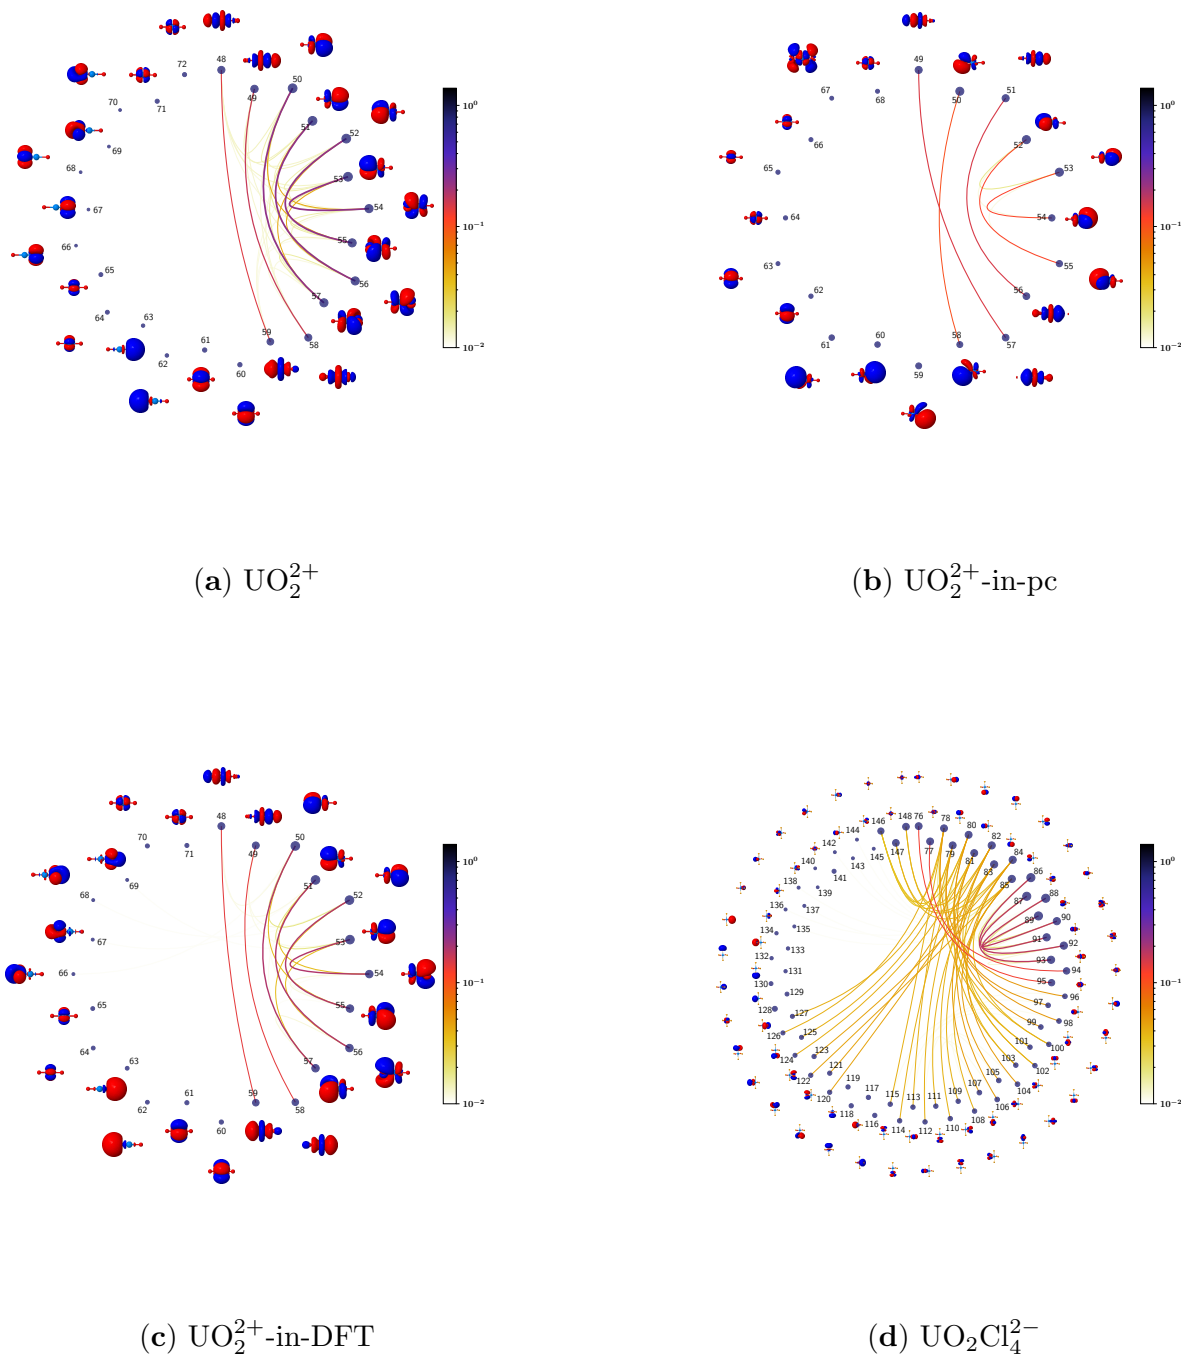

Figure S6: Mutual information ( $I_{ij}$ ) of  $\text{UO}_2\text{Cl}_4^{2-}$  and related models studied in this work. The orbitals are numbered as obtained after pCCD optimization. The  $I_{ij}$  values are calculated based on single-orbital entropies calculated with the pCCD-LCCSD method.

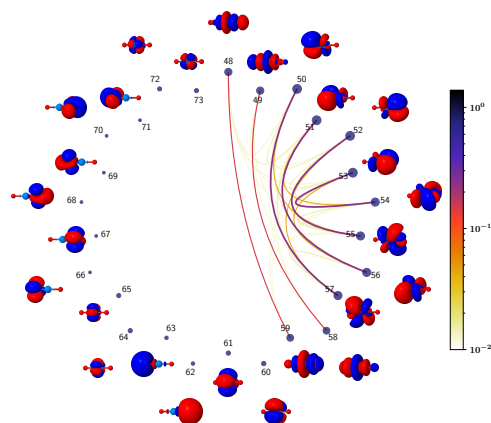(a)  $\text{UO}_2^{2+}$ 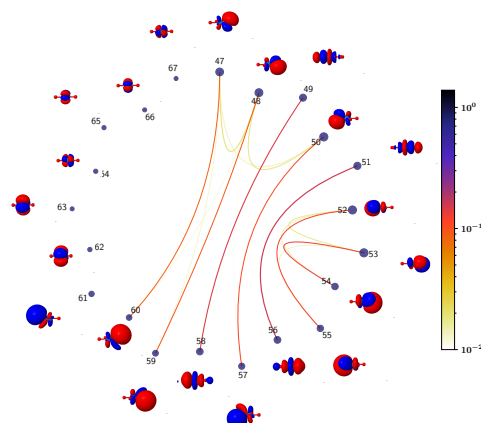(b)  $\text{UO}_2^{2+}$ -in-pc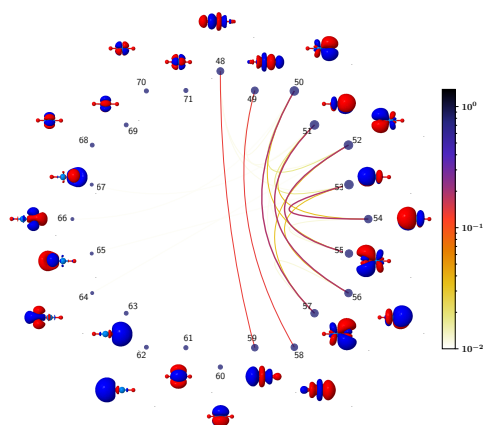(c)  $\text{UO}_2^{2+}$ -in-DFT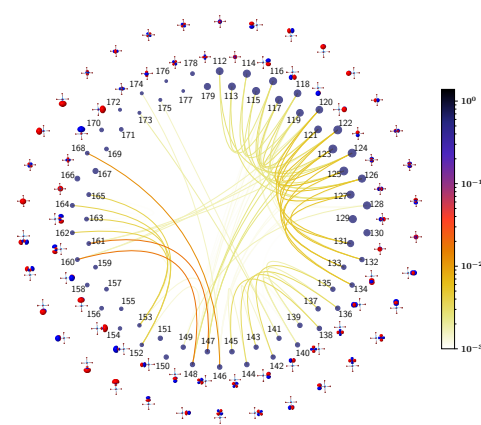(d)  $\text{UO}_2\text{Br}_4^{2-}$ 

Figure S7: Mutual information ( $I_{ij}$ ) of  $\text{UO}_2\text{Br}_4^{2-}$  and related models studied in this work. The orbitals are numbered as obtained after pCCD optimization. The  $I_{ij}$  values are calculated based on single-orbital entropies calculated with the pCCD-LCCSD method.
